# Supplementary material
Source: HighWire-hosted journal article supplement (https://informatics.bmj.com/content/32/1/e101300)
Supplement: inline-supplementary-material-1 [file inline-supplementary-material-1.pdf]

**Supplementary file: Example of the summary information displayed in dashboards. This is example is based on the dashboard definitions at the time of inception.**

| Dashboard                     | Viewed in                      | Overview                                                                                                                                                                                           | Key Information (High Level)                                                                                                                                                                                                                                                                                                                                                                                                                           | Displayed in DCC | Data Source                                             | Owner    |
|-------------------------------|--------------------------------|----------------------------------------------------------------------------------------------------------------------------------------------------------------------------------------------------|--------------------------------------------------------------------------------------------------------------------------------------------------------------------------------------------------------------------------------------------------------------------------------------------------------------------------------------------------------------------------------------------------------------------------------------------------------|------------------|---------------------------------------------------------|----------|
| Daily Huddle Dashboard        | EMR                            | An organisational overview of Access & Flow for the day.<br>Will provide summary information for DCC & Access Huddles.<br>Creates whole of hospital visibility.                                    | <ul style="list-style-type: none"> <li>– Escalation Triggers (15 min lag)</li> <li>– Access &amp; Flow summary tiles</li> <li>– ED overview</li> <li>– Surgery overview</li> <li>– Inpatient capacity overview</li> <li>– Yesterday's data summary</li> </ul>                                                                                                                                                                                          | Yes              | EMR & some Health intelligence (HI) components (future) | EMR Team |
| Progression of Care Dashboard | EMR                            | Data that has a clear allocated responsibility and an action related to discharges today.<br>Will present patients with an EDD of today that are awaiting certain tasks or consults for discharges | <ul style="list-style-type: none"> <li>– Patients who are medically ready with a barrier to being discharge ready</li> <li>– Patients who have not been updated as medically or discharge ready</li> <li>– Patients are not medically ready but have an EDD of today</li> <li>– Script status</li> <li>– Automates other potential days (imaging requests and consult orders)</li> <li>– Pending bed cleans or transfers from EMR (FM data)</li> </ul> | Yes              | EMR                                                     | EMR Team |
| Bed Management Tool           | Business intelligence software | Overview of each ward including bed allocation and capacity. Provides an overview of closed and open beds.                                                                                         | <ul style="list-style-type: none"> <li>– Open/closed beds</li> <li>– Number of current allocated beds</li> <li>– Number of vacant beds</li> <li>– Can be seen by division/service (summary and ward view)</li> <li>– Can add an expected column that will predict</li> </ul>                                                                                                                                                                           | Yes              | HI                                                      | HI Team  |
| Access & Flow Forecast Tool   | Business intelligence software | Forecasting beds and capacity for today and tomorrow                                                                                                                                               | <ul style="list-style-type: none"> <li>– Number of predicted discharges based on previous data</li> </ul>                                                                                                                                                                                                                                                                                                                                              | No               | HI                                                      | HI Team  |

|                               |                                |                                                                                                 |                                                                                                                                                                                                                                          |     |     |          |
|-------------------------------|--------------------------------|-------------------------------------------------------------------------------------------------|------------------------------------------------------------------------------------------------------------------------------------------------------------------------------------------------------------------------------------------|-----|-----|----------|
|                               |                                |                                                                                                 | <ul style="list-style-type: none"> <li>- Predicted expects (admissions) by ward based on previous data</li> <li>- ED arrivals</li> <li>- Ambulance prediction</li> <li>- Over time tracking</li> </ul>                                   |     |     |          |
| Hospital Status Dashboard     | Business intelligence software | The source of all escalation data and actions from the Tier 2 huddle                            | <ul style="list-style-type: none"> <li>- Escalation status</li> <li>- Factors impacting escalation outside of triggers</li> <li>- Duration of escalation</li> <li>- Agreed and defined action plan from tier 2 and escalation</li> </ul> | No  | HI  | HI Team  |
| Theatre Forecasting Dashboard | EMR                            | A tool that will look at the next 7 days for elective surgery bookings and emergency cases.     | <ul style="list-style-type: none"> <li>- Scheduled utilisation</li> <li>- Vacancy</li> <li>- Projected utilisation</li> <li>- Surgery counts</li> </ul>                                                                                  | No  | EMR | EMR Team |
| ED Trackboard                 | EMR                            | A tool that summarises all patients within ED                                                   | <ul style="list-style-type: none"> <li>- ED Bed allocations</li> <li>- SSU Bed allocations</li> <li>- BAU allocations</li> </ul>                                                                                                         | Yes | EMR | EMR Team |
| Transit Lounge Dashboard      | EMR                            | A summary of all patients in transit lounge, patients that meet criteria based on EDDs of today | <ul style="list-style-type: none"> <li>- Transit lounge chairs available</li> <li>- Patients that meet criteria for transfer</li> <li>- EDDs for today and tomorrow</li> </ul>                                                           | Yes | EMR | EMR Team |
